# Supplementary material for: A monolithic 5-(pyrrolidin-2-yl)tetrazole flow microreactor for the asymmetric aldol reaction in water–ethanol solvent
Source: Royal Society of Chemistry journal article supplement (doi:10.1039/c5re00017c), 2015-11-04

## Monolithic 5-(pyrrolidin-2-yl)tetrazole flow microreactor for the asymmetric aldol reaction in water-ethanol solvent

Roberto Greco,<sup>a</sup> Lorenzo Caciolli,<sup>a</sup> Anna Zaghi,<sup>a</sup> Omar Pandoli,<sup>b</sup> Olga Bortolini,<sup>a</sup> Alberto Cavazzini,<sup>a</sup> Carmela De Risi,<sup>a</sup> and Alessandro Massi\*<sup>a</sup>

<sup>a</sup>*Dipartimento di Scienze Chimiche e Farmaceutiche, Università di Ferrara, Via Fossato di Mortara 17, I-44121 Ferrara (Italy). E-mail: [alessandro.massi@unife.it](mailto:alessandro.massi@unife.it)*

<sup>b</sup>*Departamento de Química, Pontifícia Universidade Católica - PUC-Rio, Rua Marques de São Vicente, 225, 22451-900, Rio de Janeiro (Brazil)*

### Electronic supplementary information

#### Table of content:

|                                                                    |    |
|--------------------------------------------------------------------|----|
| <sup>1</sup> H and <sup>13</sup> C NMR of new compounds <b>2-4</b> | S2 |
| FT-IR spectra of <b>M5</b> and <b>M6</b>                           | S6 |
| Figure S1. SEM image of <b>MM6</b> fracture surface                | S6 |
| HPLC chromatograms of β-hydroxyketones <b>9-11</b>                 | S7 |

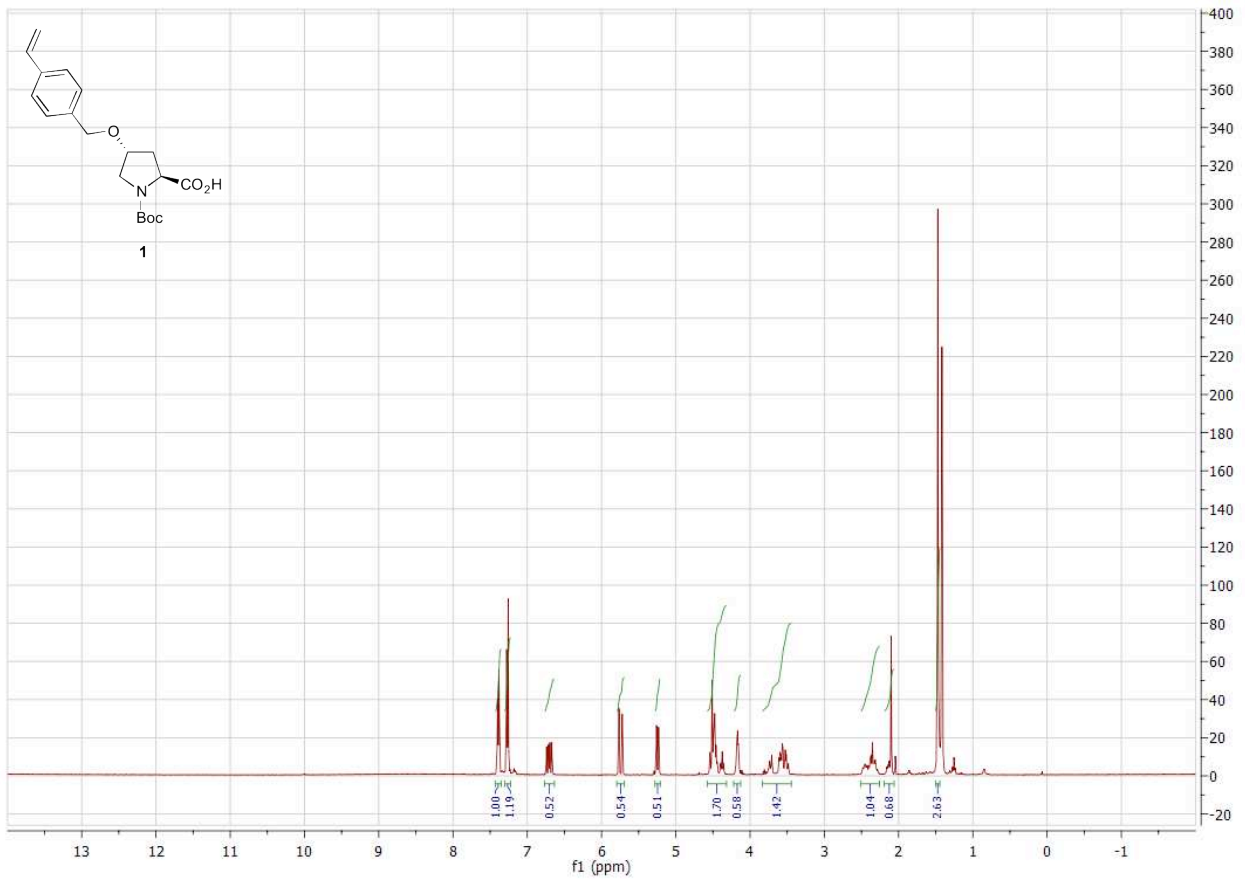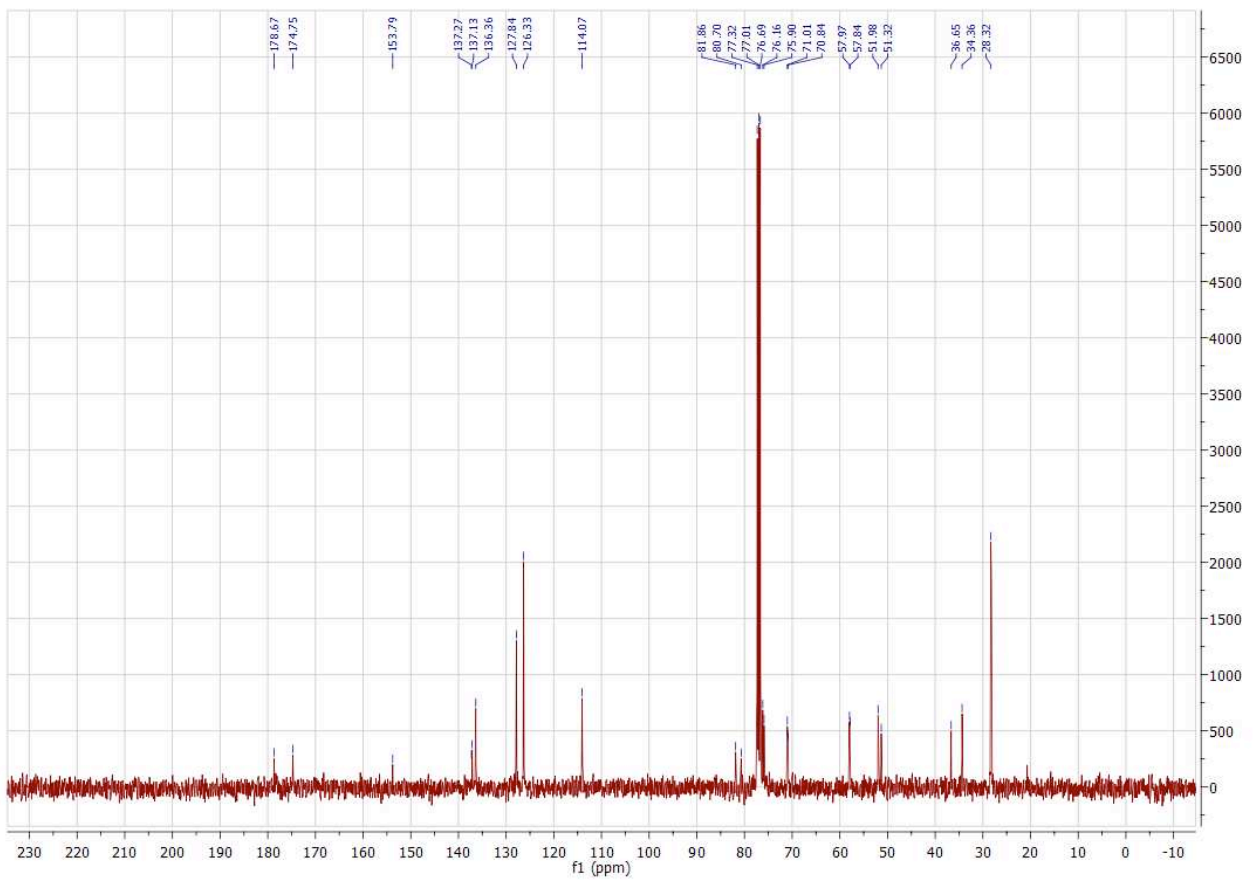

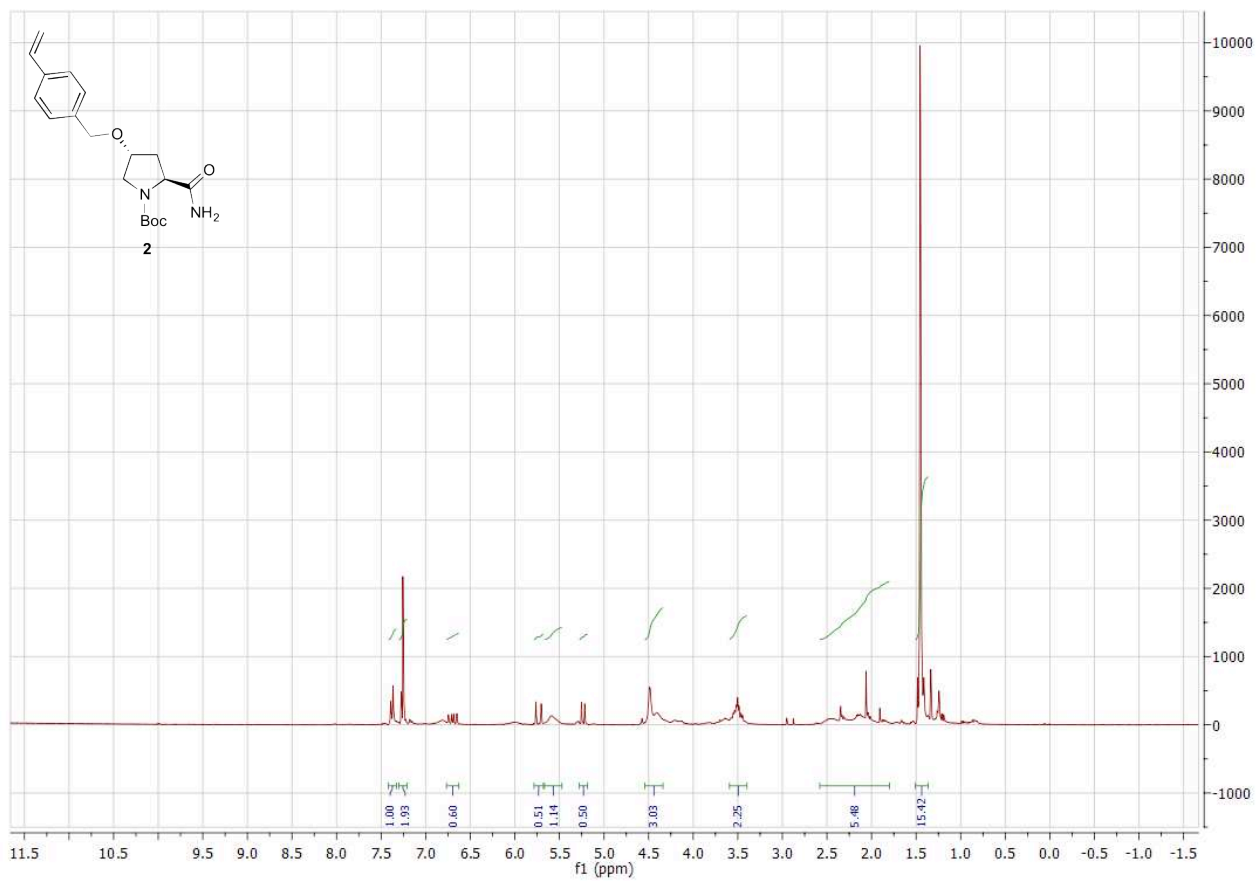

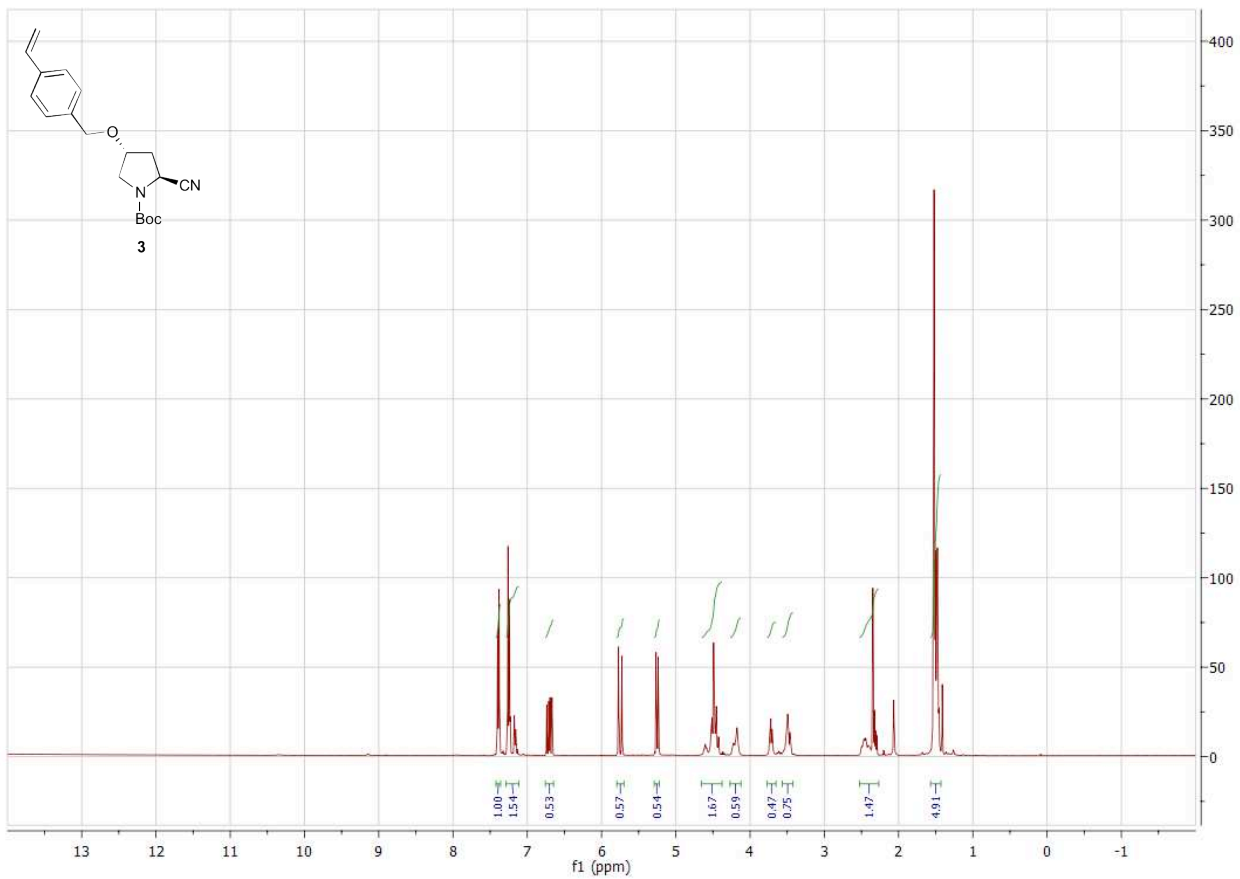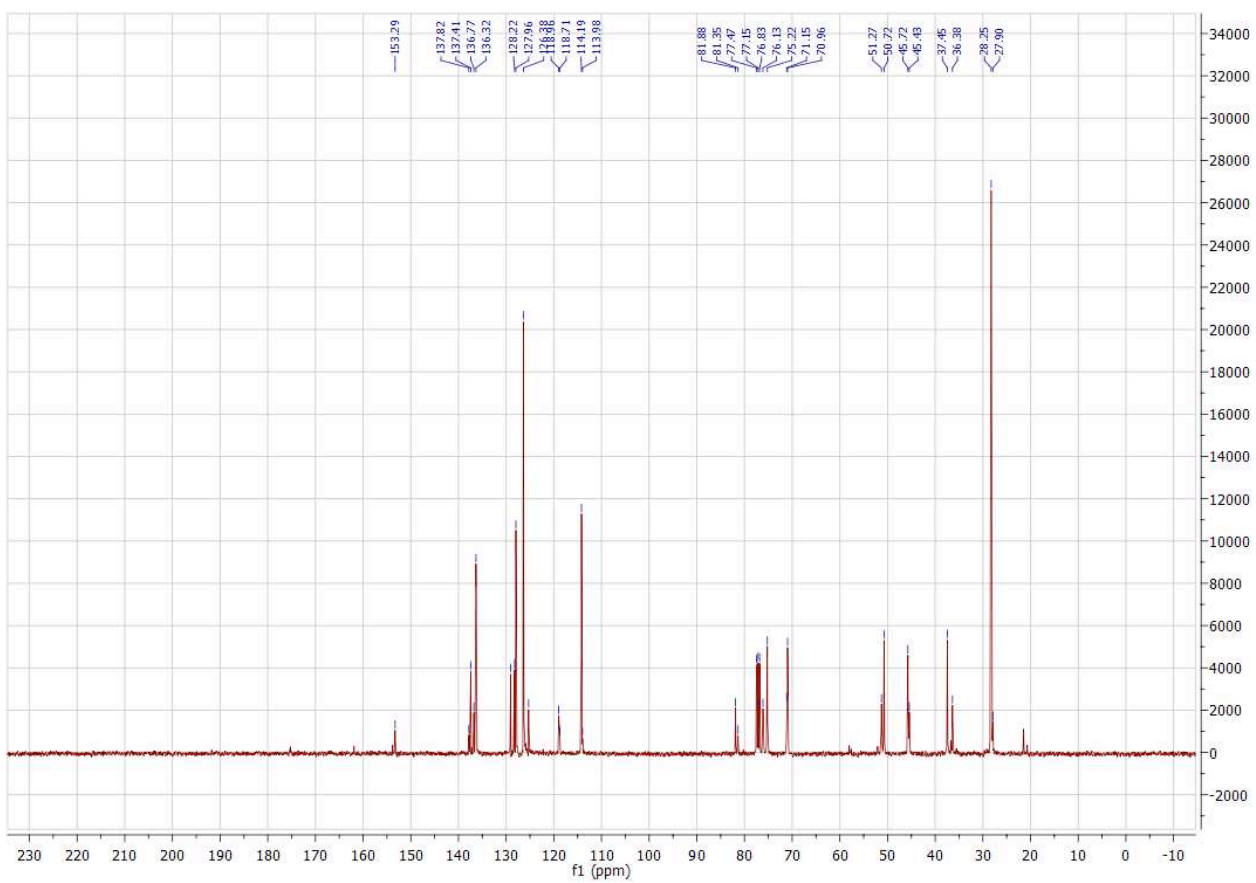

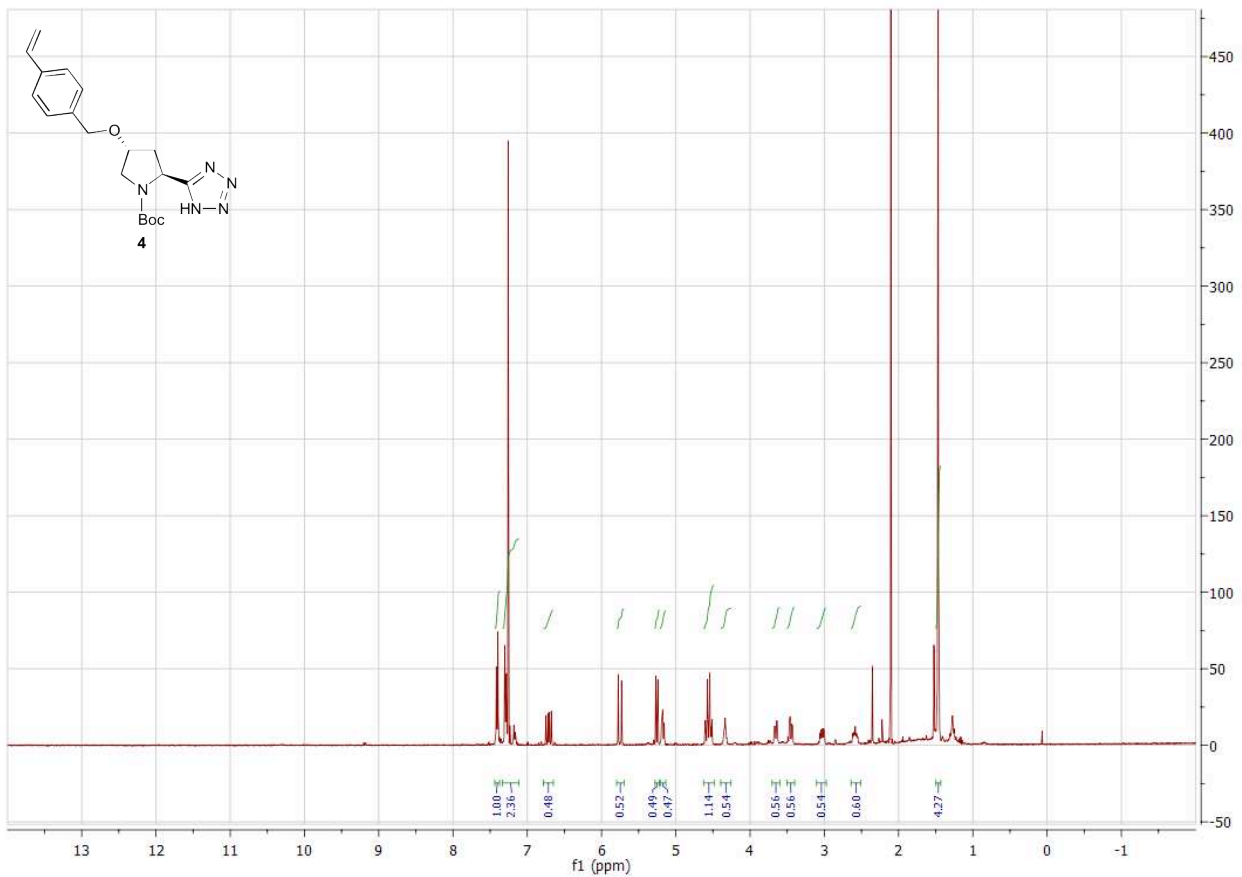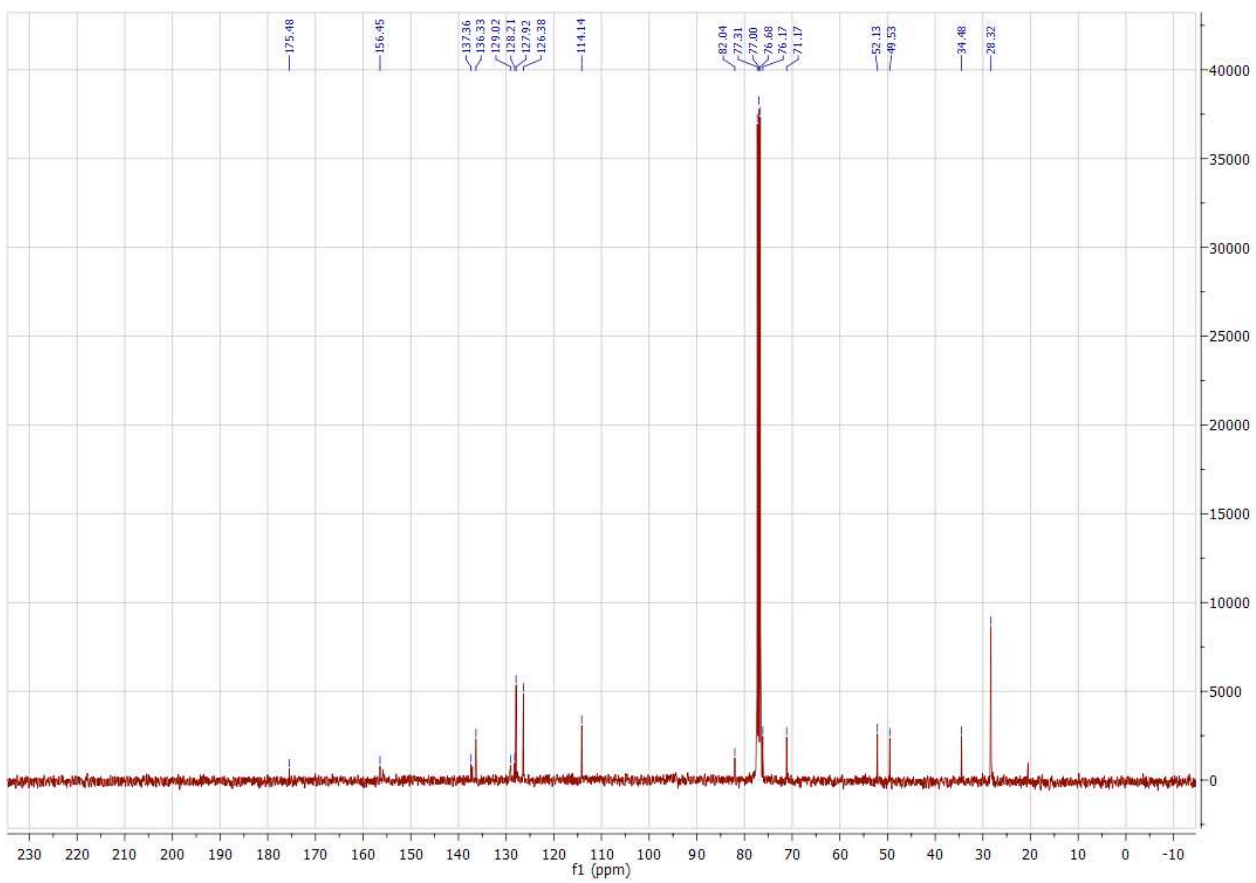

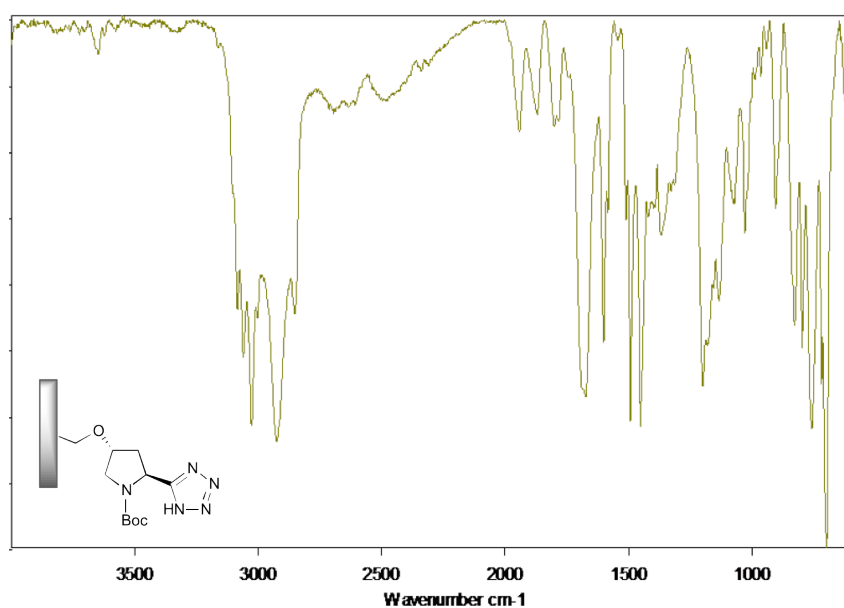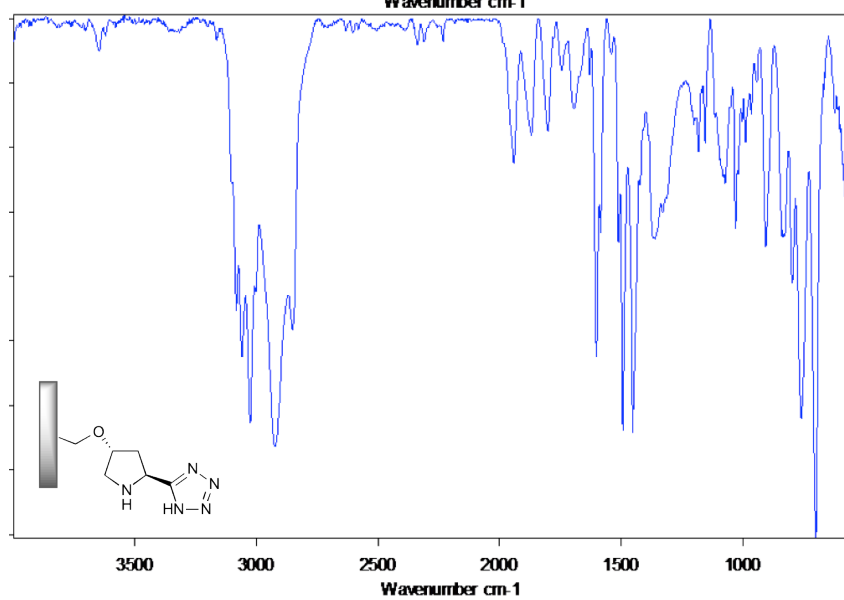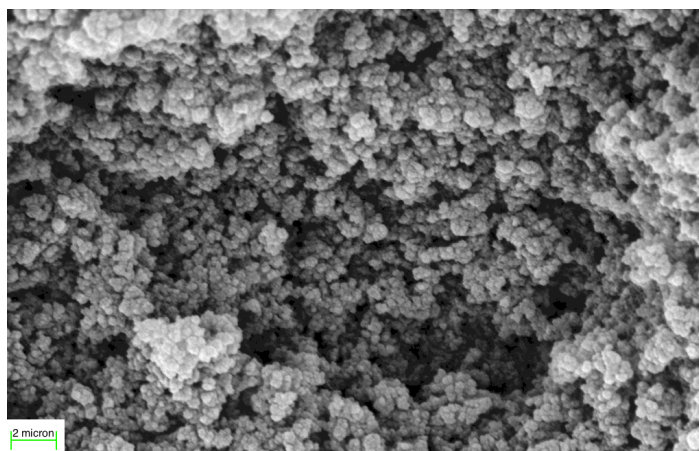

Figure S1. SEM image of MM6 fracture surface.

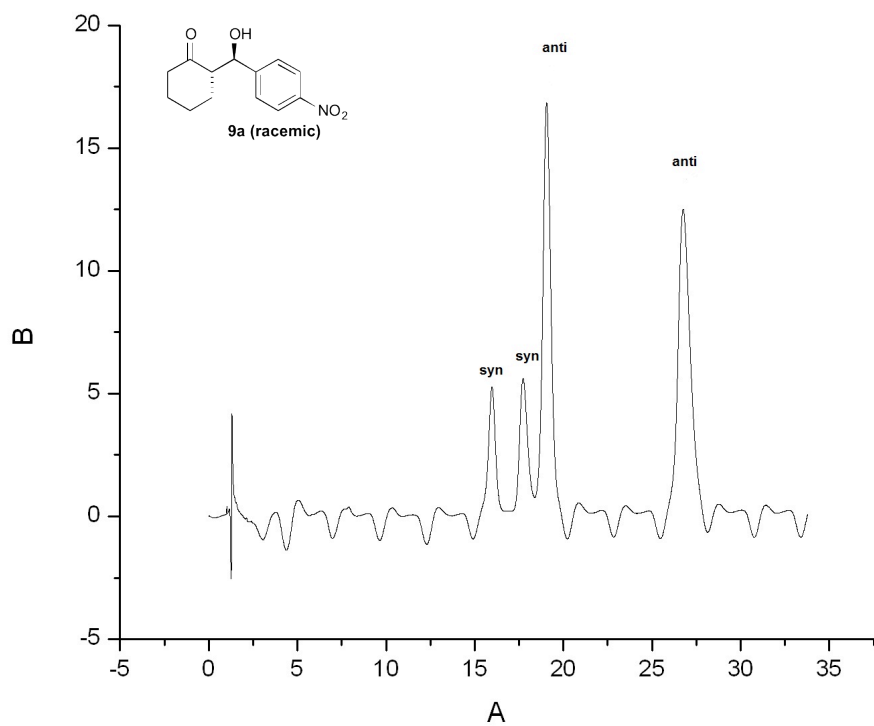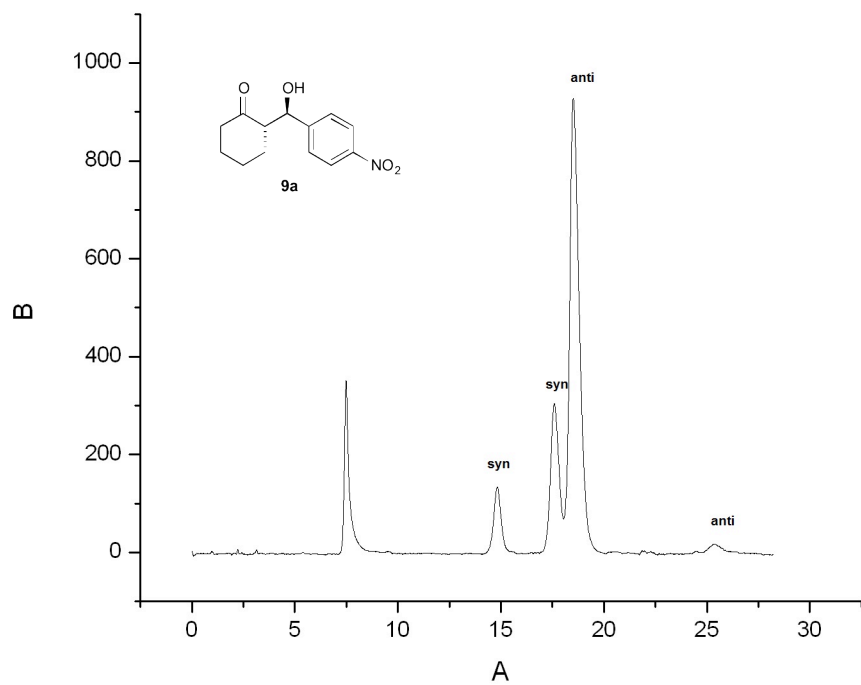

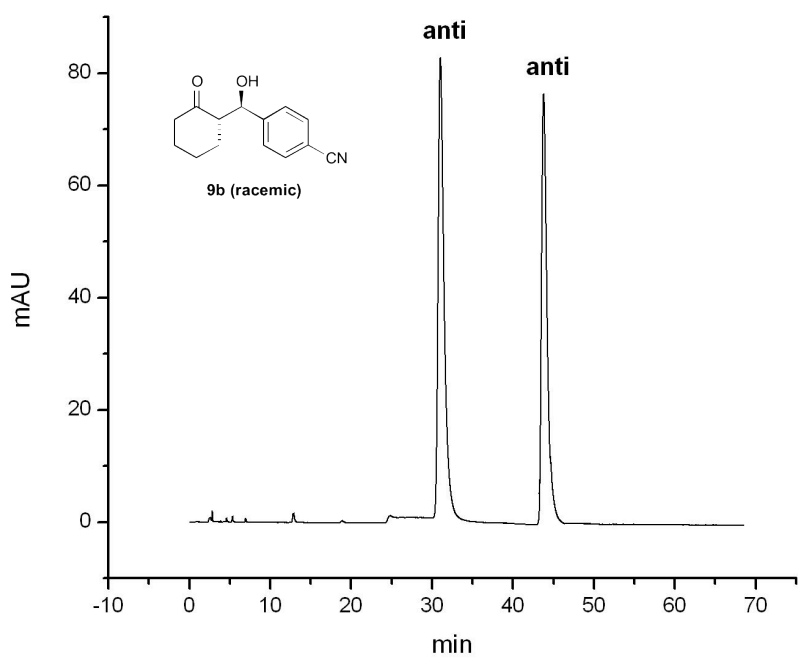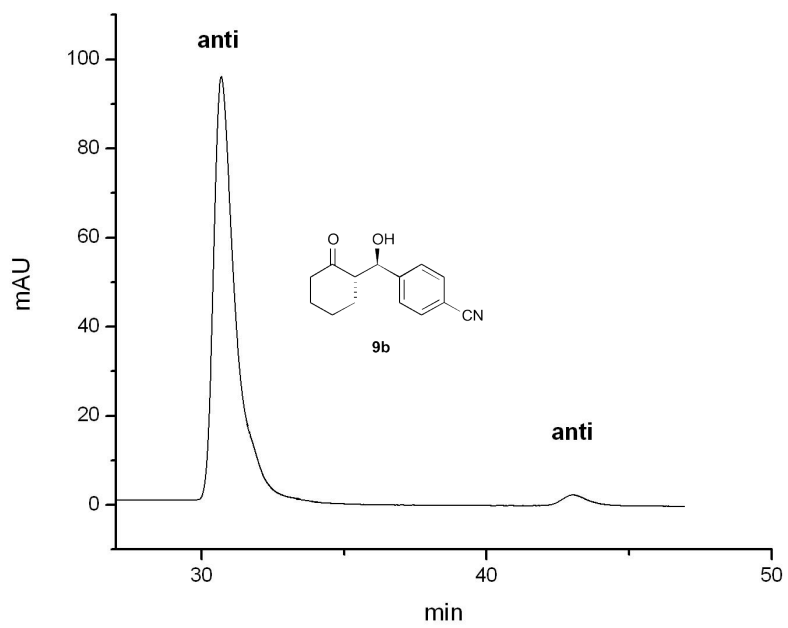



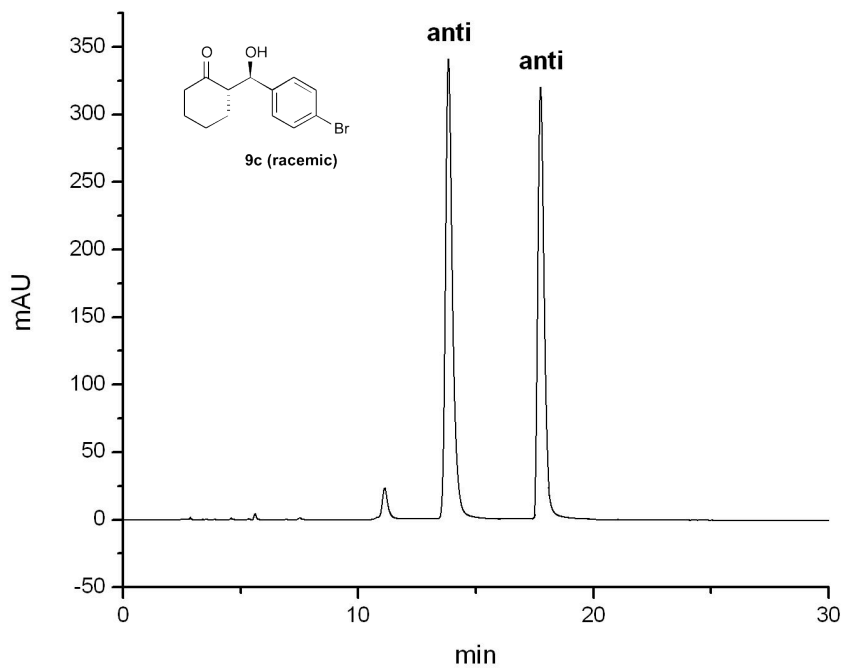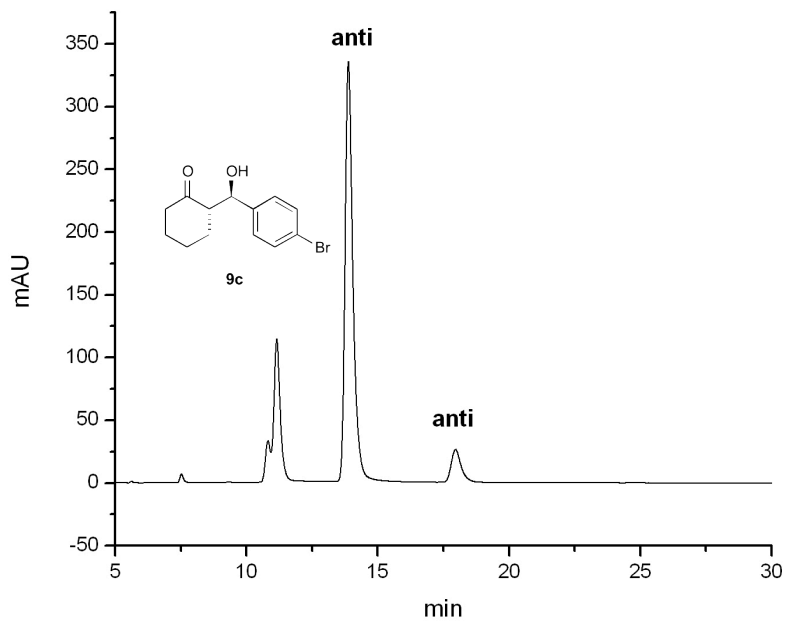

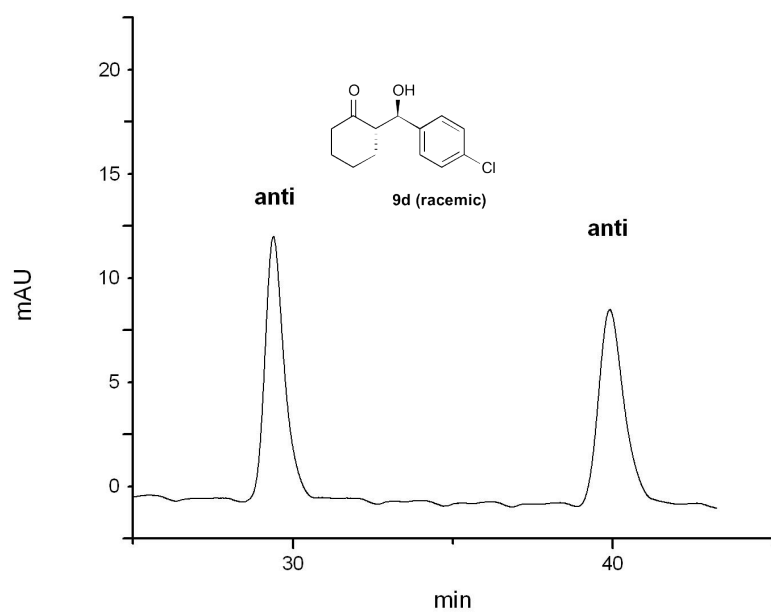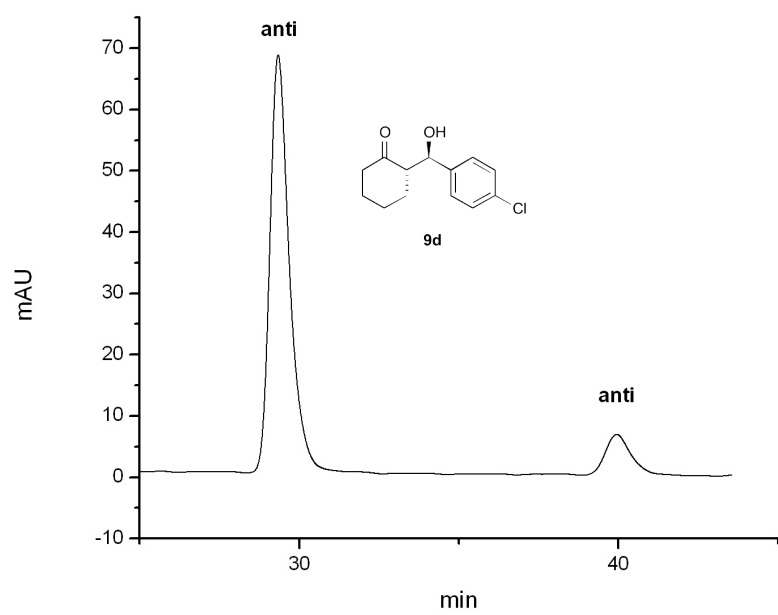

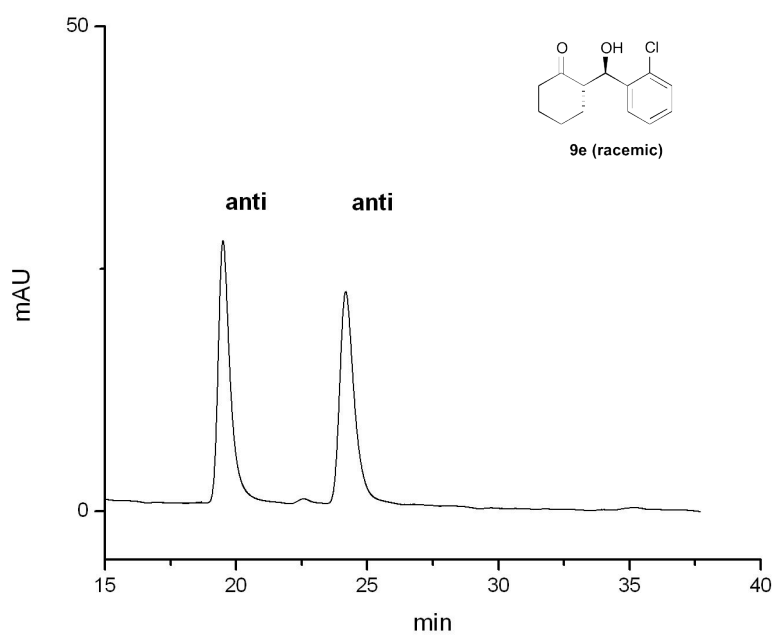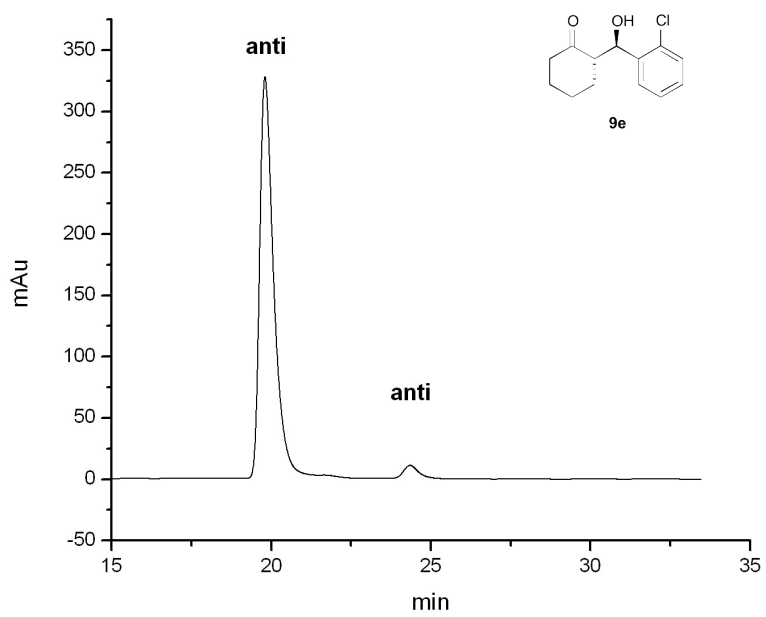

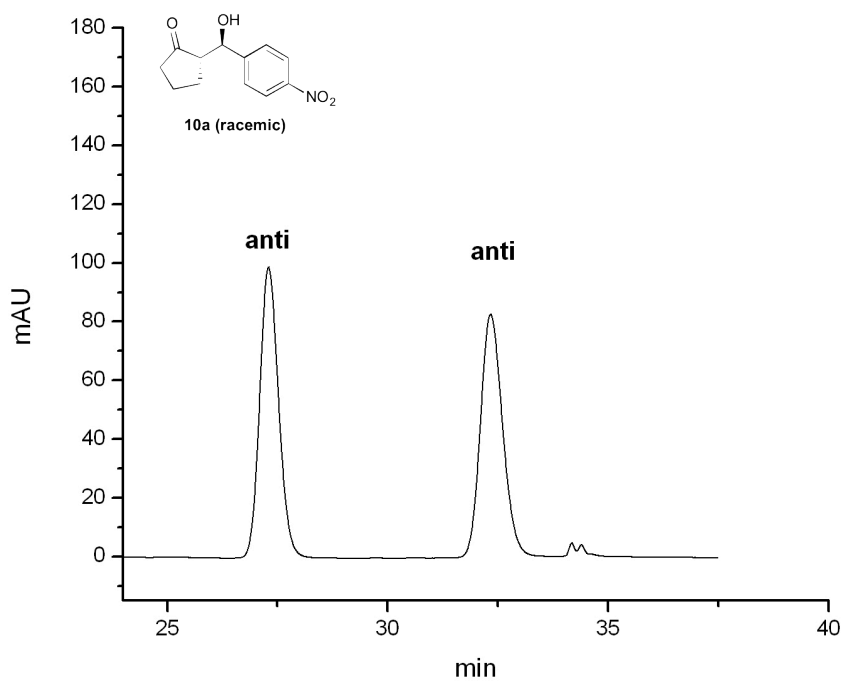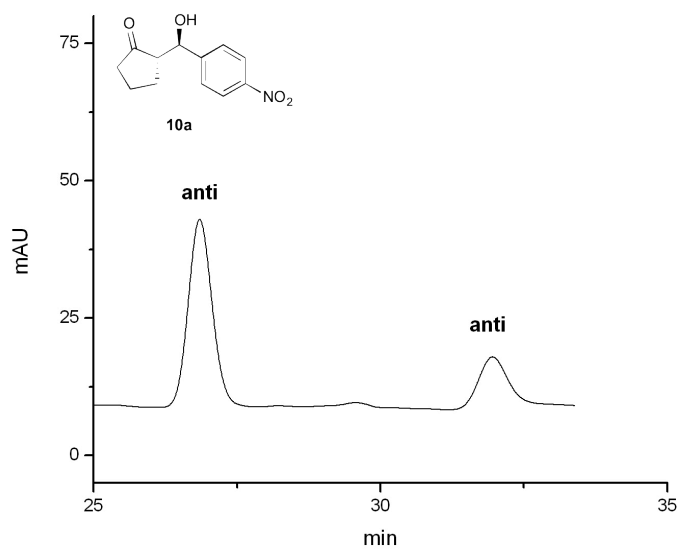

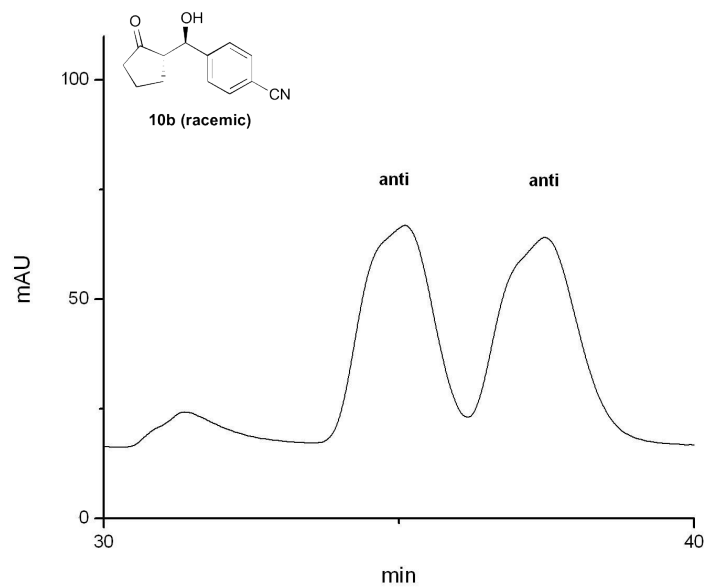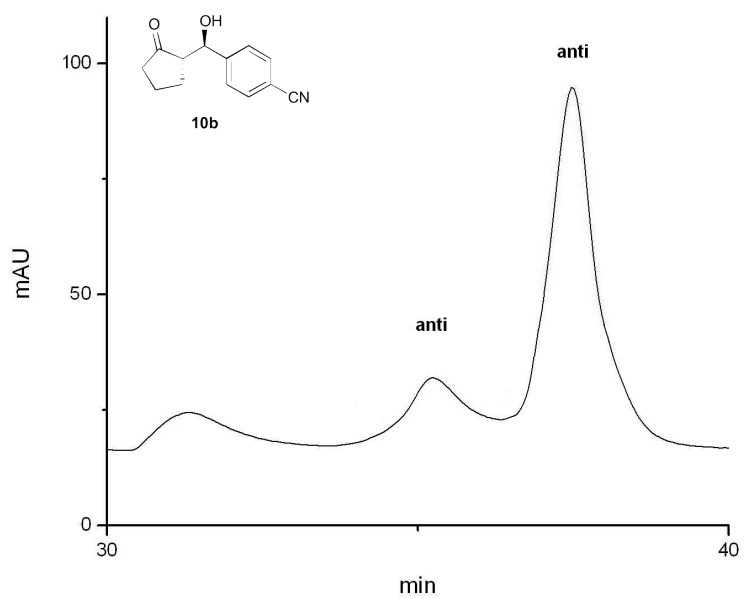

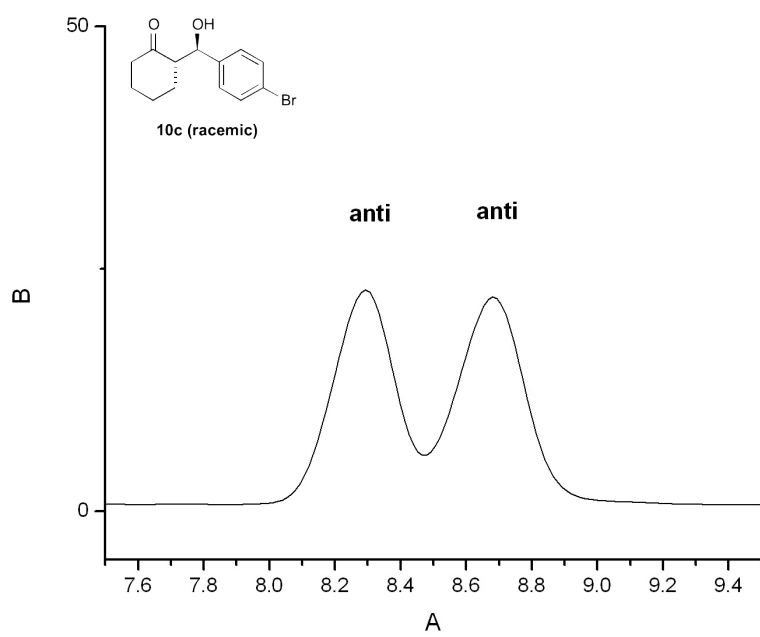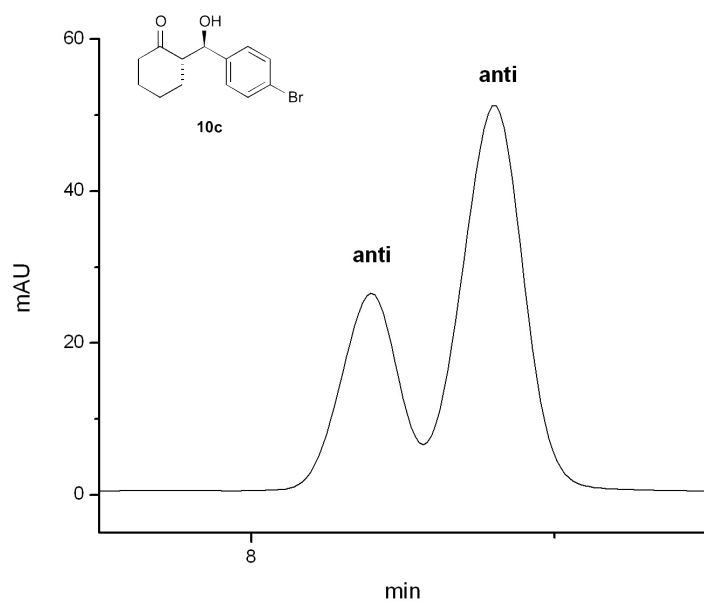

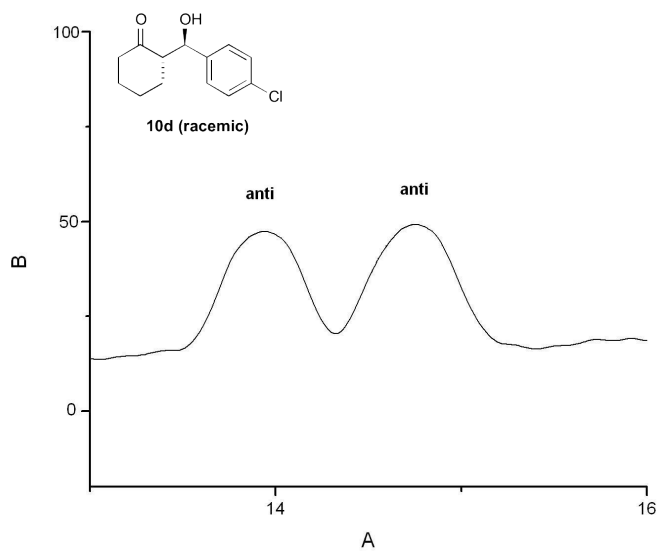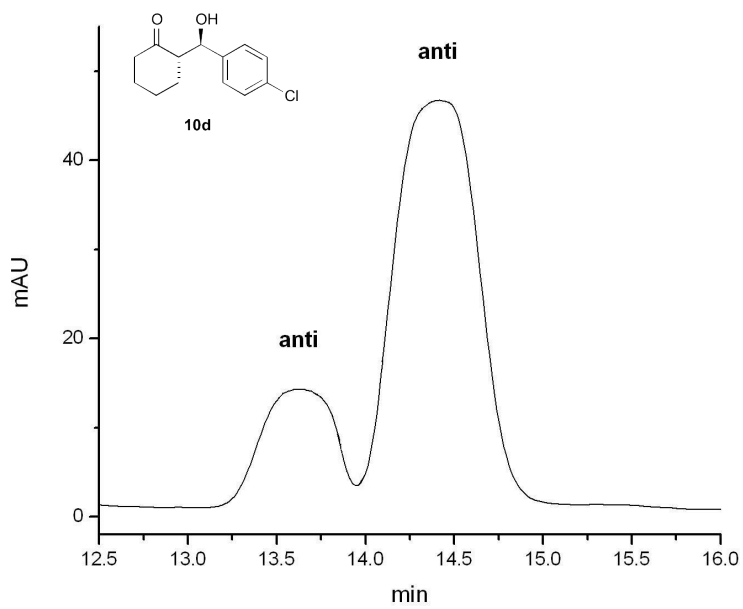

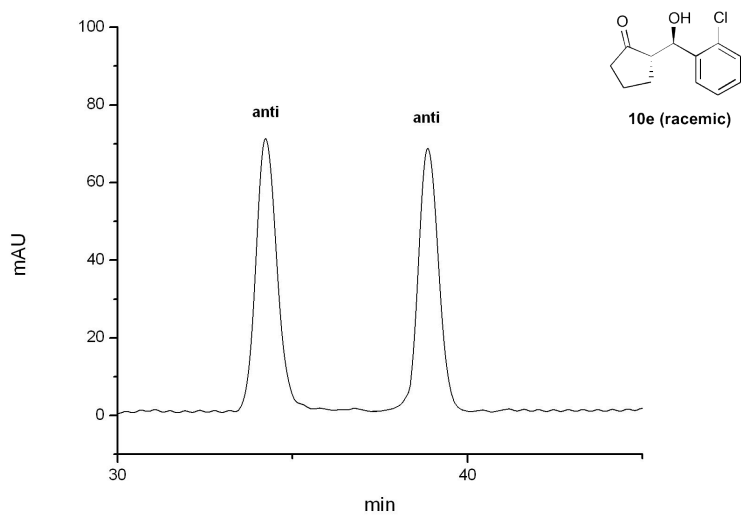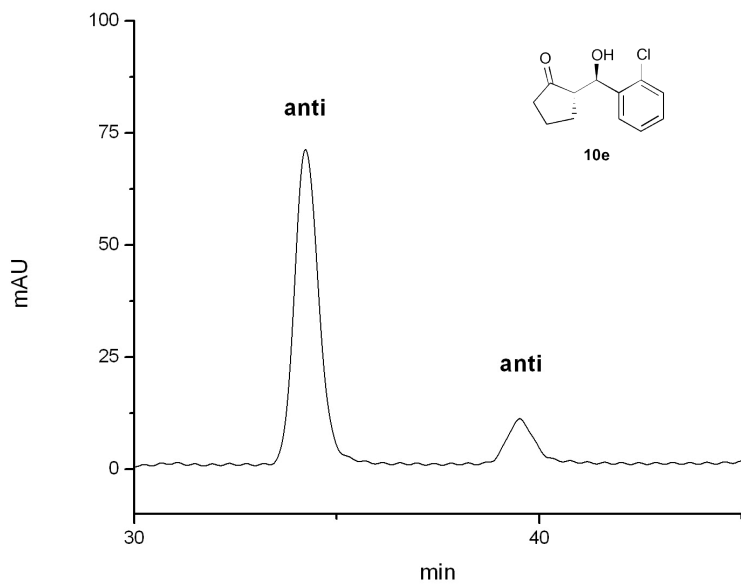



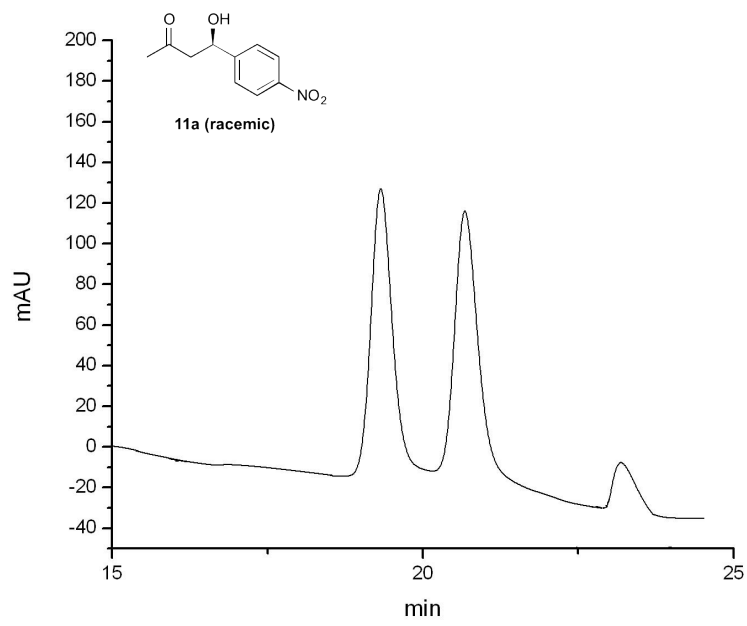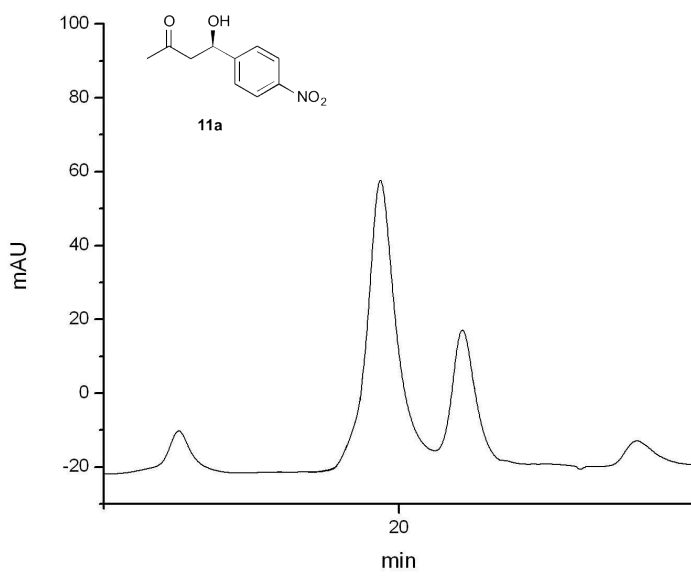

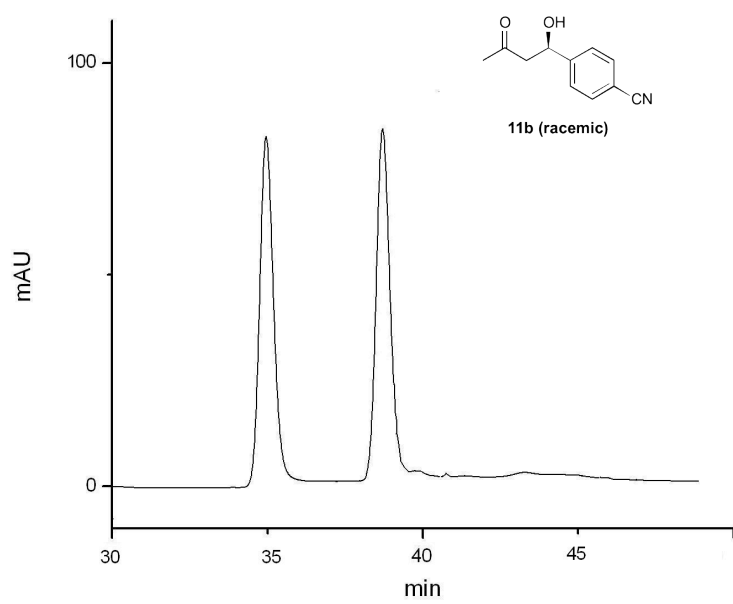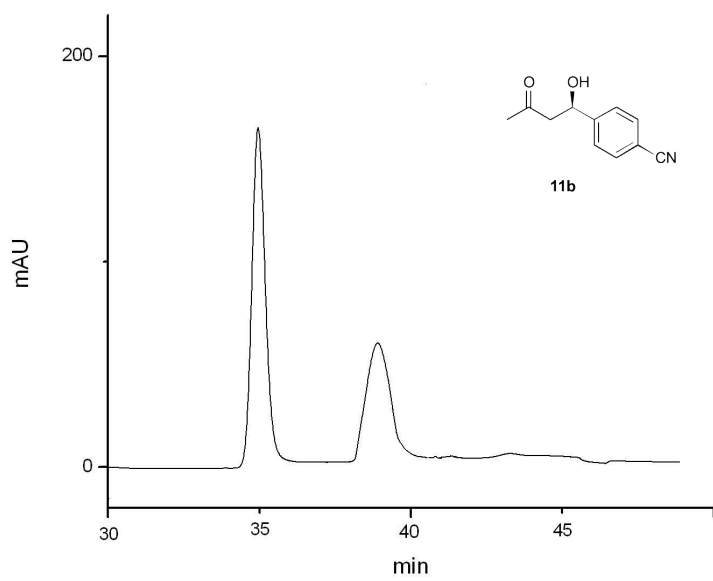

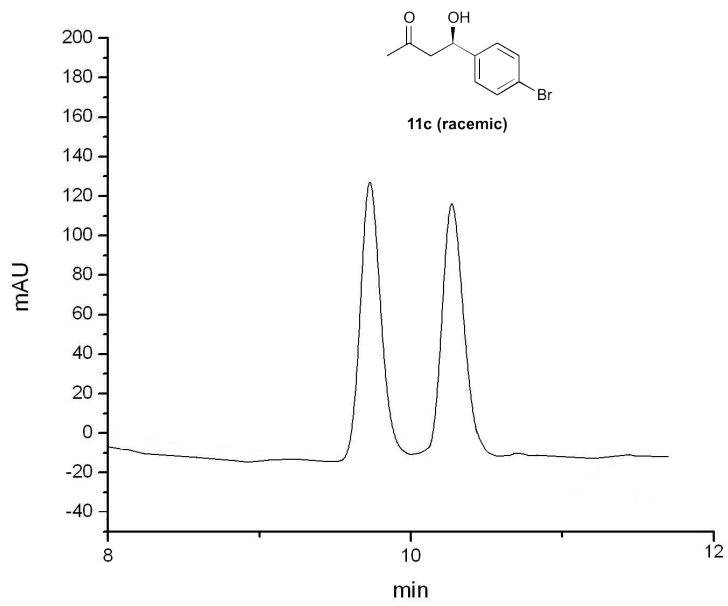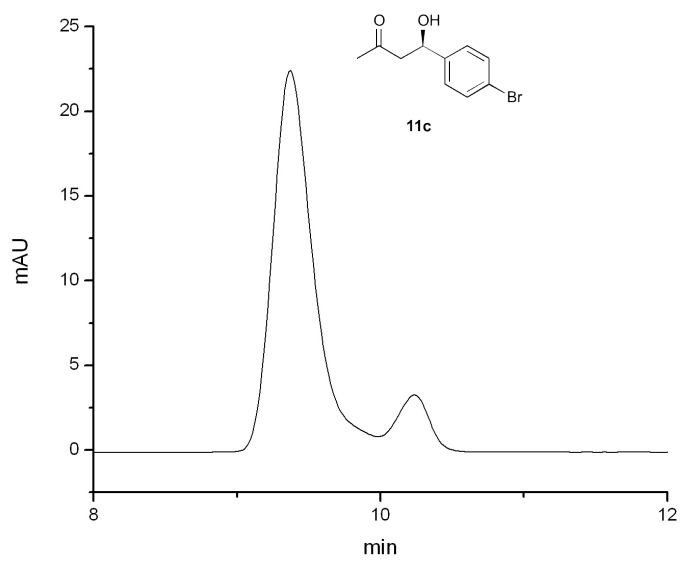

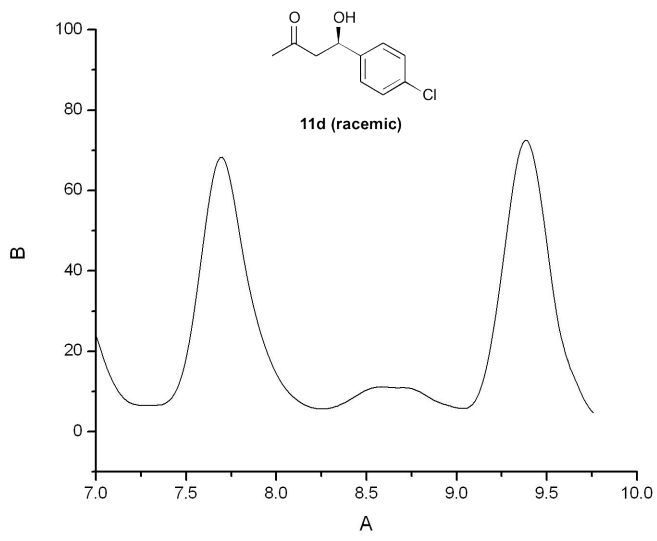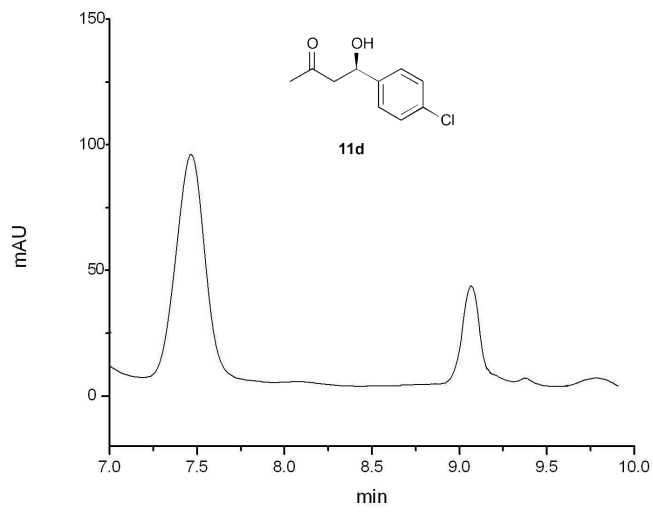

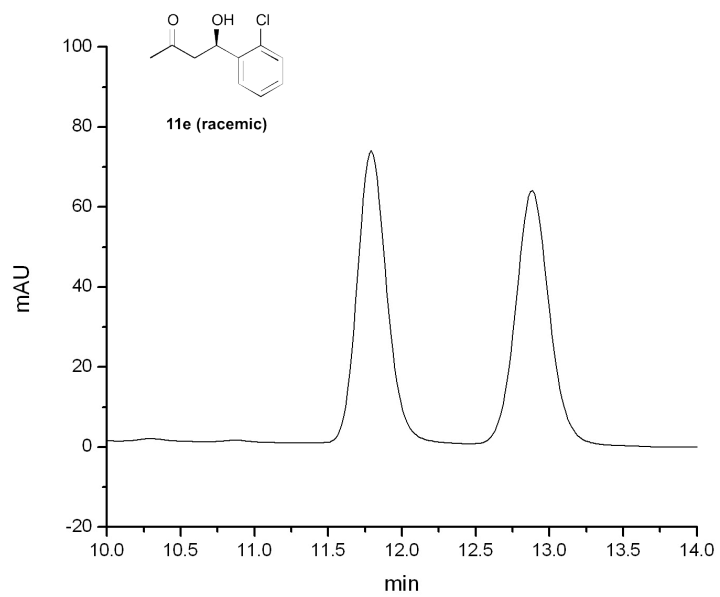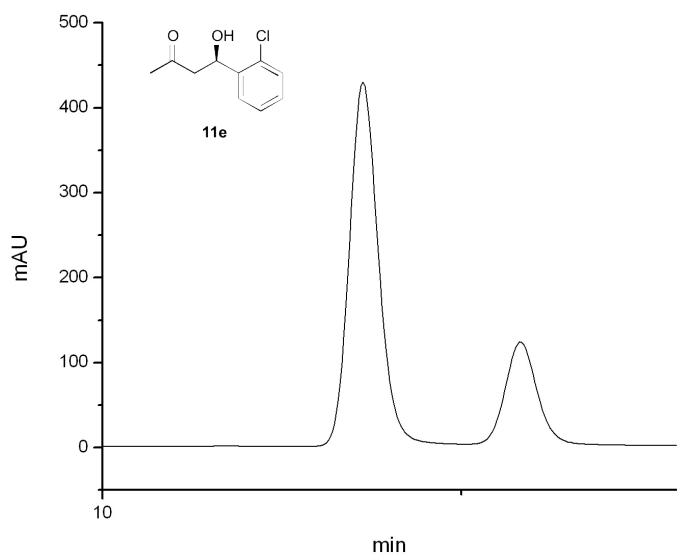

Supplement: c5re00017c1.pdf [file c5re00017c1.pdf]
